# Supplementary material for: A comparison of two Stokes ice sheet models applied to the Marine Ice Sheet Model Intercomparison Project for plan view models (MISMIP3d)
Source: Copernicus journal article supplement (doi:10.5194/tc-11-179-2017), 2017-01-25
Supplement: Supplementary file 1 [file tc-11-179-2017-supplement.zip]

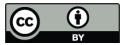

## *Supplement of*

# **A comparison of two Stokes ice sheet models applied to the Marine Ice Sheet Model Intercomparison Project for plan view models (MISMIP3d)**

**T. Zhang et al.**

*Correspondence to:* Stephen Price ([sprice@lanl.gov](mailto:sprice@lanl.gov))

- tc-11-179-2017-supplement-title-page.pdf
- README.txt
- Stnd
  - stnd\_felix.vtk
- \_\_MACOSX
  - .\_README.txt
  - .\_p75d
  - .\_p75sr
  - Stnd
    - \* .\_stnd\_felix.vtk
  - p75d
    - \* .\_p75d\_felix.vtk
  - p75sr
    - \* .\_FELIX\_Ny20\_margin.txt
    - \* .\_FELIX\_Ny40\_center.txt
    - \* .\_FELIX\_Ny40\_margin.txt
    - \* .\_FELIX\_Ny80\_center.txt
- p75d
  - p75d\_felix.vtk
- p75sr
  - FELIX\_Ny20\_center.txt
  - FELIX\_Ny20\_margin.txt
  - FELIX\_Ny40\_center.txt

- FELIX\_Ny40\_margin.txt
- FELIX\_Ny80\_center.txt
- FELIX\_Ny80\_margin.txt

The copyright of individual parts of the supplement might differ from the CC-BY 3.0 licence.
